# Supplementary material for: Cationic polymer synergizing with chemotherapeutics and re-purposing antibiotics against cancer cells
Source: Royal Society of Chemistry journal article supplement (doi:10.1039/d0bm02155e), 2021-01-01
Supplement: d0bm02155e1.pdf [file d0bm02155e1.pdf]

**Supplementary Information for**  
**Cationic polymer synergizing with chemotherapeutics and re-purposing antibiotics against cancer cells**

Yiran Zheng,<sup>\*a,b</sup> Jessica Kng,<sup>b</sup> Chuan Yang,<sup>b</sup> James L. Hedrick,<sup>c</sup> Yi Yan Yang,<sup>\*b</sup>

<sup>a</sup>College of Pharmaceutical Sciences, Soochow University, Suzhou 215123, P. R. China. Email: [yrzheng@suda.edu.cn](mailto:yrzheng@suda.edu.cn)

<sup>b</sup>Institute of Bioengineering and Nanotechnology, Agency for Science Technology and Research. 31 Biopolis way, Singapore 138669. Email: [yyyang@ibn.a-star.edu.sg](mailto:yyyang@ibn.a-star.edu.sg)

<sup>c</sup>IBM Almaden Research Center, 650 Harry Road, San Jose, CA 95120, USA

\*Corresponding authors

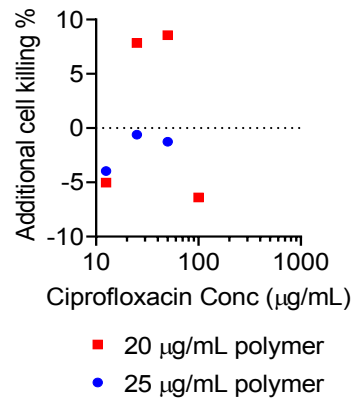

**Supplementary Figure 1: Percentage of MCF-7 cells killed more than additive effects by combination therapy at certain antibiotic concentrations in the presence of polymer at 20 µg/mL.** Additive effects = percentage of cells killed by ciprofloxacin alone + percentage of cells killed by polymer alone. Synergistic effect is observed when additional cell killing is positive and antagonistic effect is observed when additional cell killing is negative.

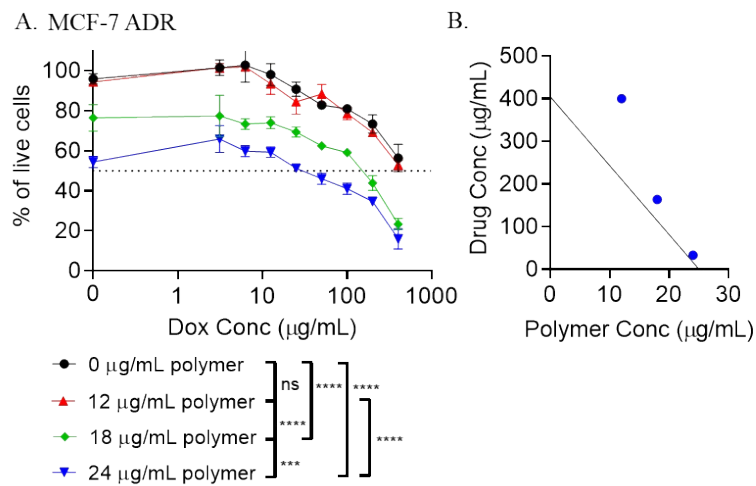

**Supplementary Figure 2: Guanidinium-functionalized polymer failed to elicit synergistic effects with the chemotherapeutic drug Dox in treating cancer cells.** (A) Killing efficacy of different concentrations of Dox and polymer in MCF-7 ADR cancer cells. (B) Isobologram analysis representing an antagonistic effect between Dox and polymer in MCF-7 ADR cancer cells. Solid line was drawn from IC<sub>50</sub> values of Dox and polymer alone. Value above the line indicates an antagonistic effect at the polymer concentration tested. Statistically analysis was done by two-way ANOVA followed by Tukey’s multiple comparison test. \*\*\* p < 0.001, \*\*\*\* p < 0.001.
